# Supplementary material for: Deglycosylated Azithromycin Attenuates Bleomycin-Induced Pulmonary Fibrosis via the TGF-β1 Signaling Pathway
Source: MDPI journal article supplement (doi:10.3390/molecules26092820), 2021-05-10
Supplement: s1 [file s1]

## *Supplementary Material*

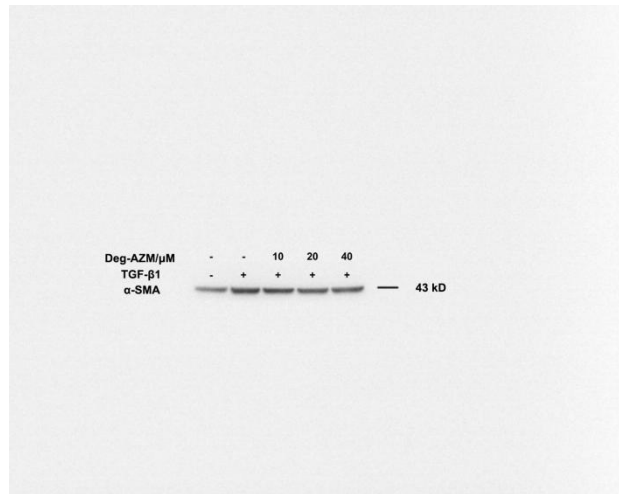

**Supplementary Figure 1.** The entire original gel of  $\alpha$ -SMA in Figure 5D.

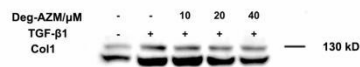

**Supplementary Figure 2.** The entire original gel of Col1 in Figure 5D.

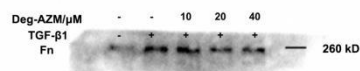

**Supplementary Figure 3.** The entire original gel of Fn in Figure 5D.

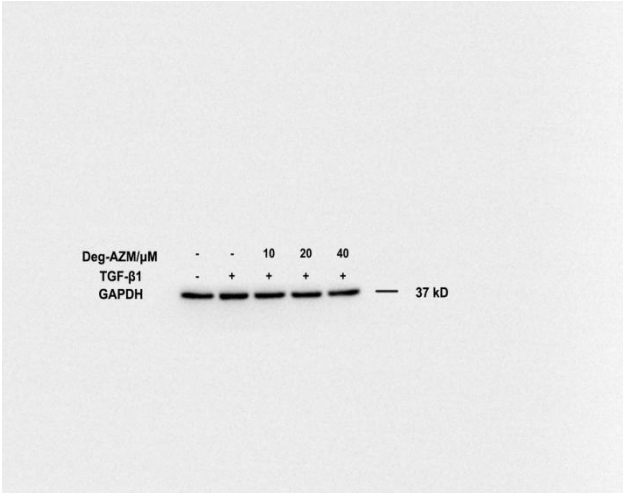

**Supplementary Figure 4.** The entire original gel of GAPDH in Figure 5D.

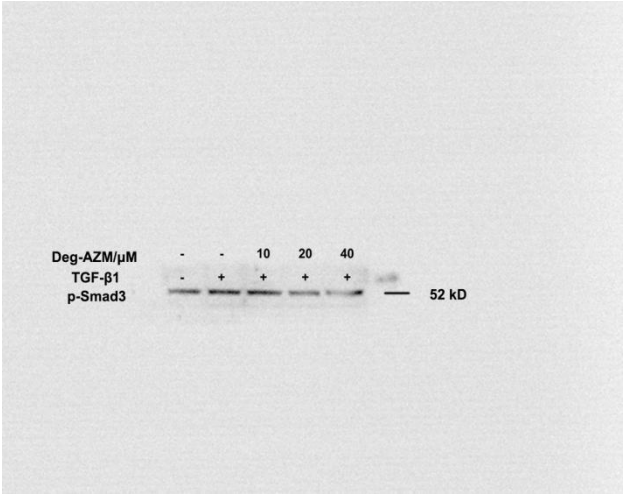

**Supplementary Figure 5.** The entire original gel of p-Smad3 in Figure 5I.

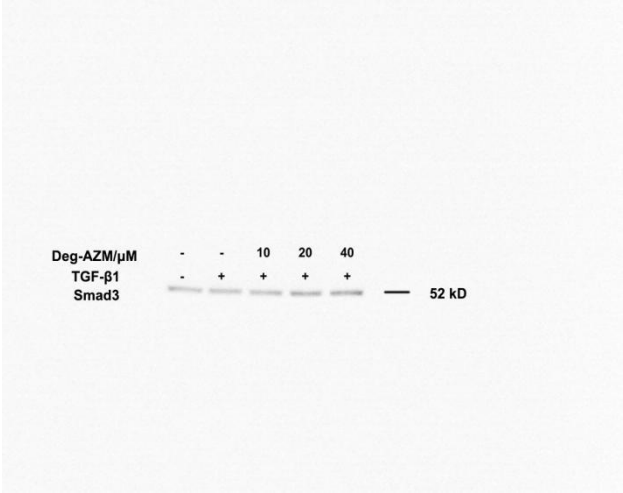

**Supplementary Figure 6.** The entire original gel of Smad3 in Figure 5I.

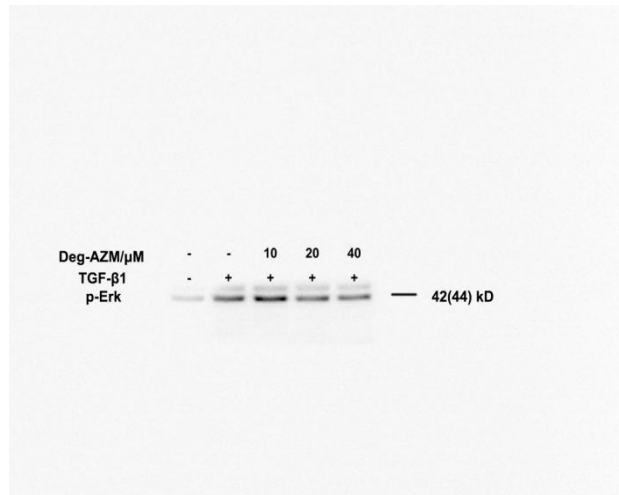

**Supplementary Figure 7.** The entire original gel of p-Erk in Figure 5I.

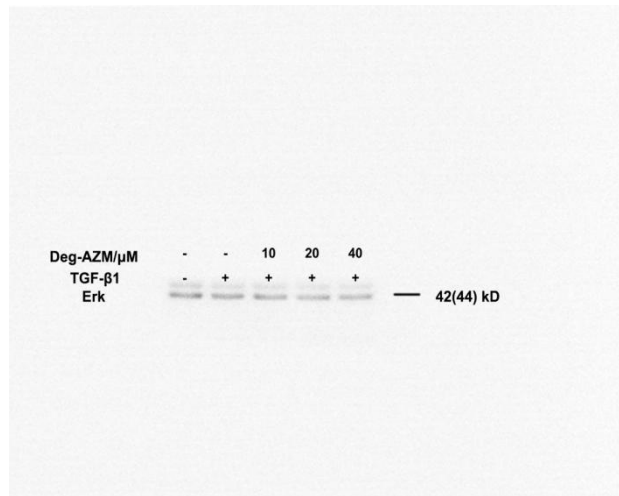

**Supplementary Figure 8.** The entire original gel of Erk in Figure 5I.

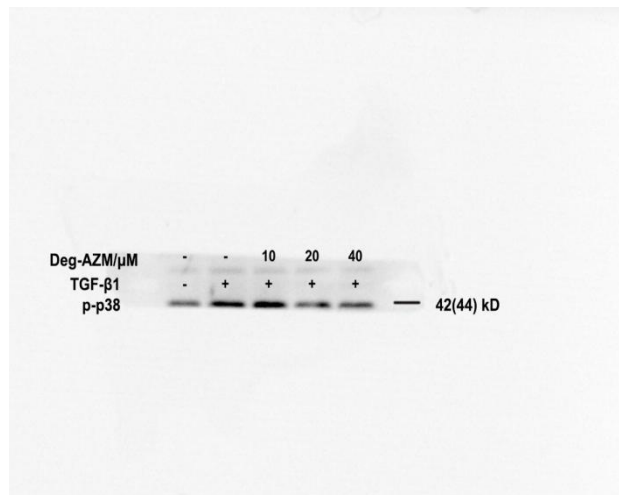

**Supplementary Figure 9.** The entire original gel of p-p38 in Figure 5I.

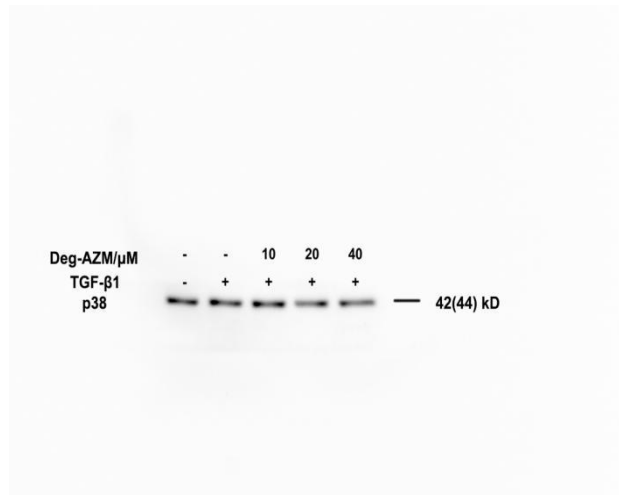

**Supplementary Figure 10.** The entire original gel of p38 in Figure 5I.

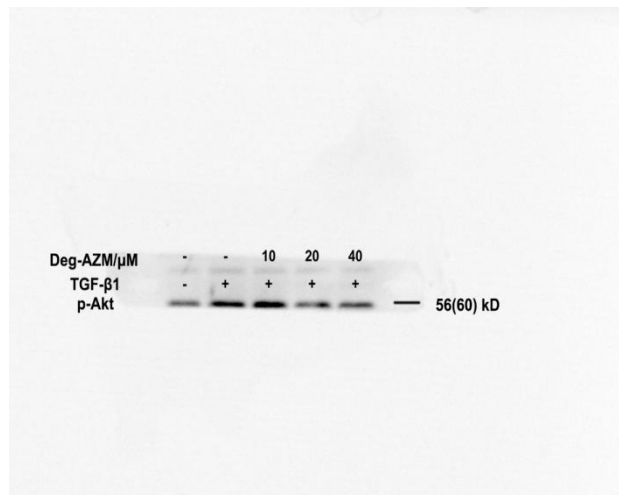

**Supplementary Figure 11.** The entire original gel of p-Akt in Figure 5I.

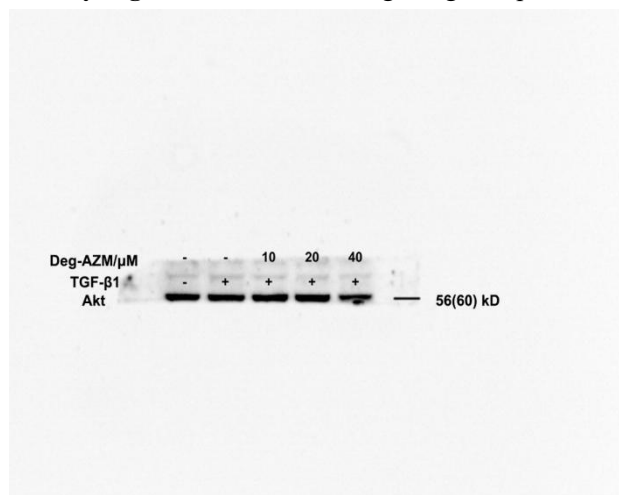

**Supplementary Figure 12.** The entire original gel of Akt in Figure 5I.

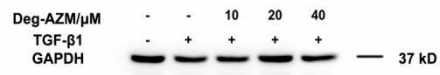

**Supplementary Figure 13.** The entire original gel of GAPDH in Figure 5I.

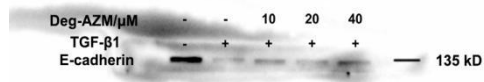

**Supplementary Figure 14.** The entire original gel of E-cadherin in Figure 6D.

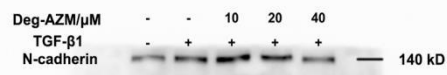

**Supplementary Figure 15.** The entire original gel of N-cadherin in Figure 6D.

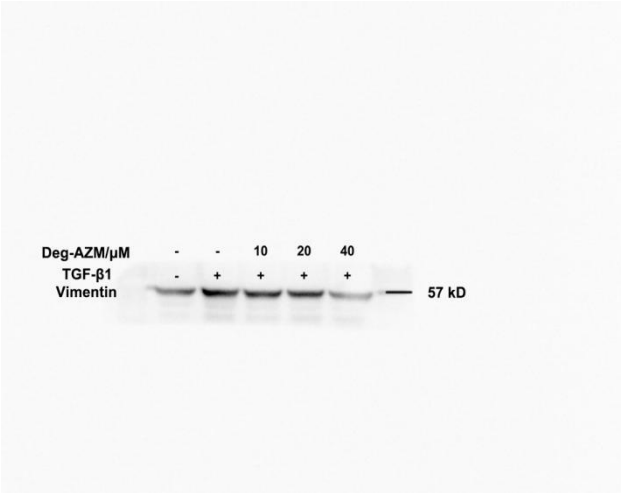

**Supplementary Figure 16.** The entire original gel of Vimentin in Figure 6D.

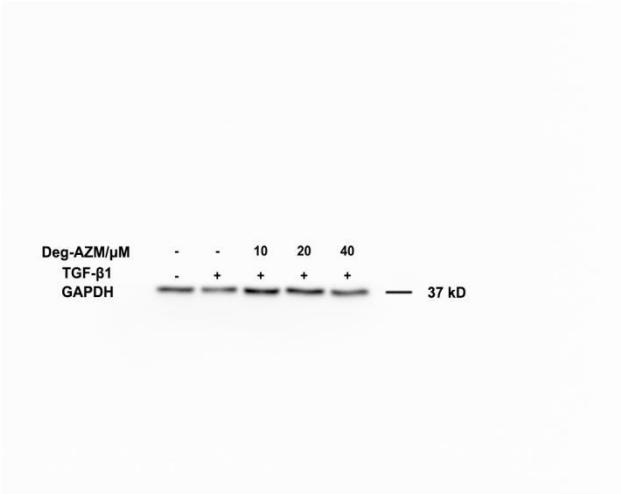

**Supplementary Figure 17.** The entire original gel of GAPDH in Figure 6D.

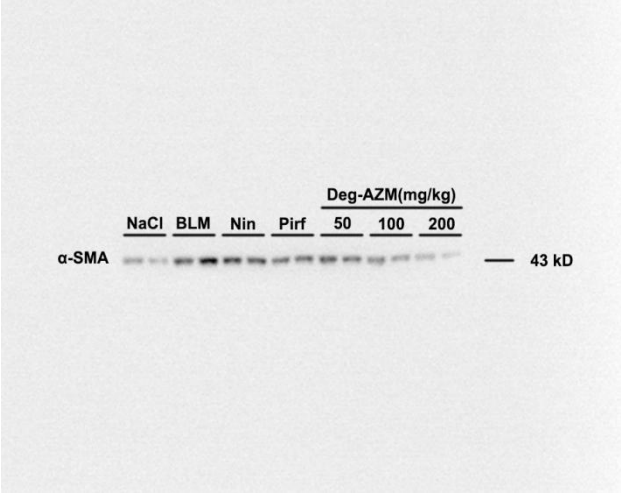

**Supplementary Figure 18.** The entire original gel of  $\alpha$ -SMA in Figure 7A.

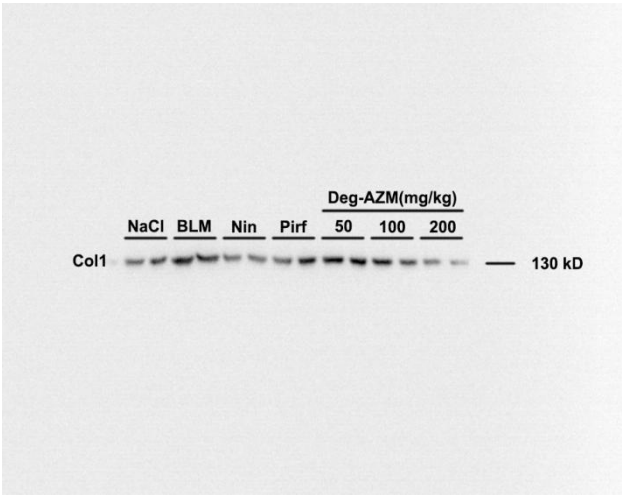

**Supplementary Figure 19.** The entire original gel of Col1 in Figure 7A.

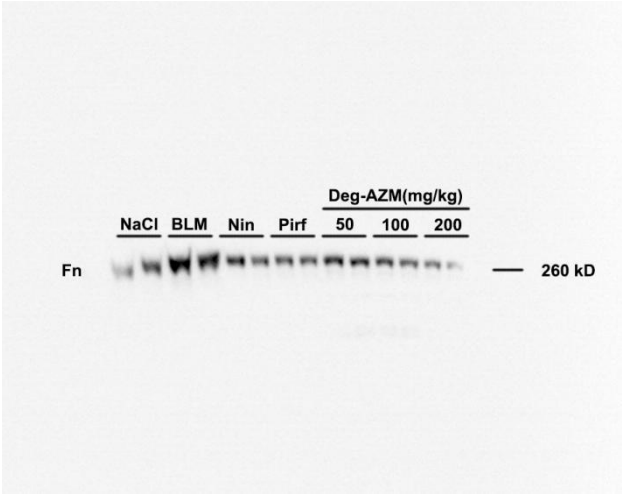

**Supplementary Figure 20.** The entire original gel of Fn in Figure 7A.

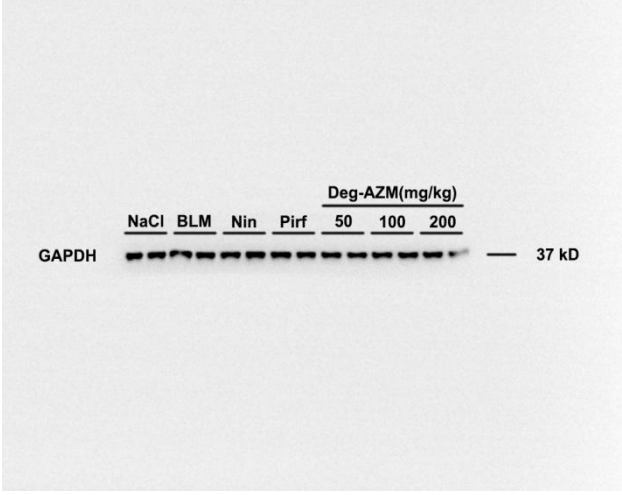

**Supplementary Figure 21.** The entire original gel of GAPDH in Figure 7A.

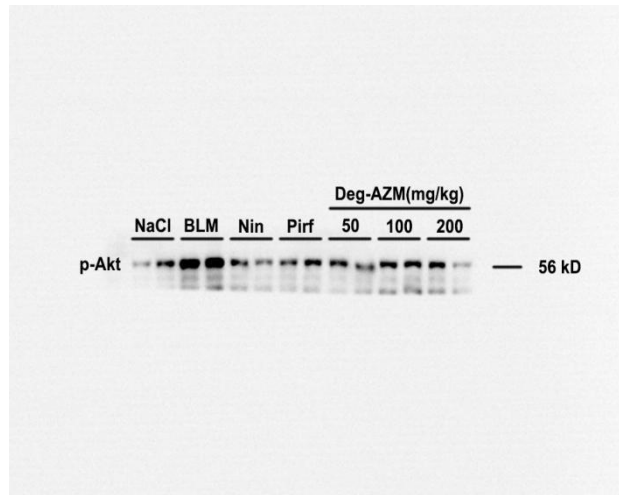

**Supplementary Figure 22.** The entire original gel of p-Akt in Figure 7K.

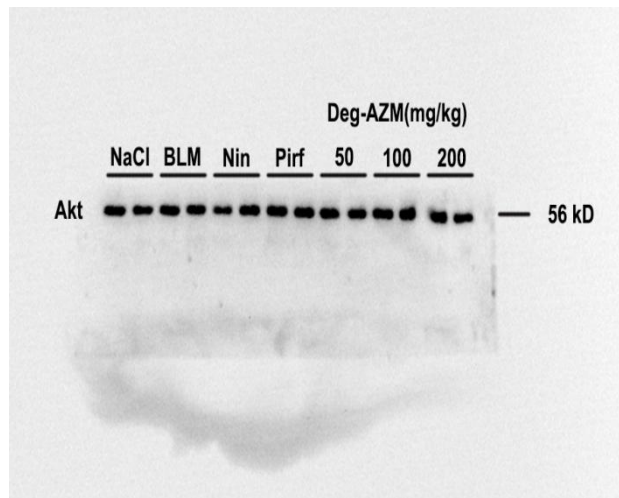

**Supplementary Figure 23.** The entire original gel of Akt in Figure 7K.

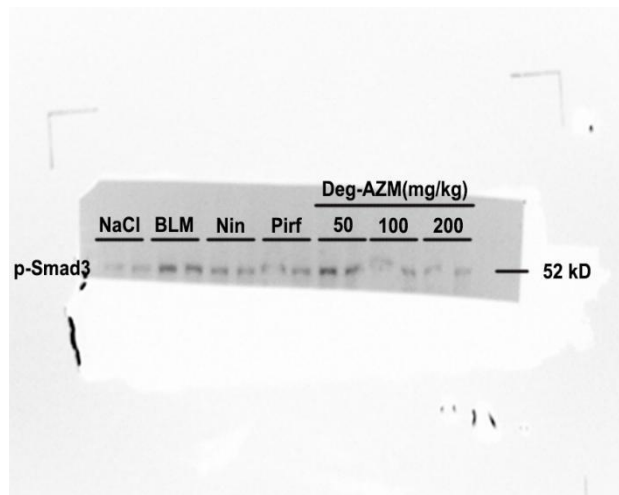

**Supplementary Figure 24.** The entire original gel of p-Smad3 in Figure 7K.



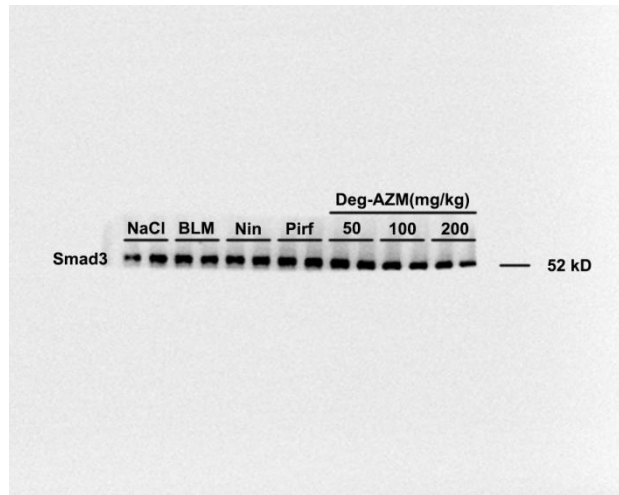

**Supplementary Figure 25.** The entire original gel of Smad3 in Figure 7K.

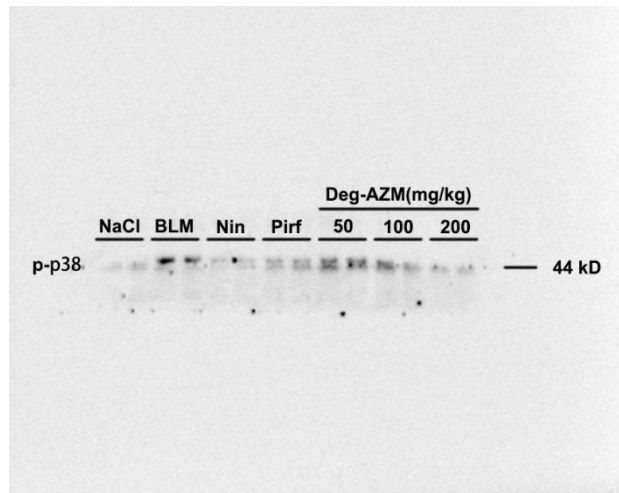

**Supplementary Figure 26.** The entire original gel of p-p38 in Figure 7K.

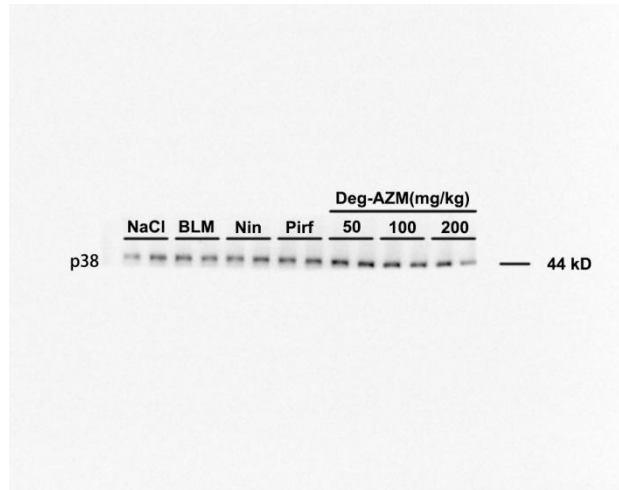

**Supplementary Figure 27.** The entire original gel of p38 in Figure 7K.

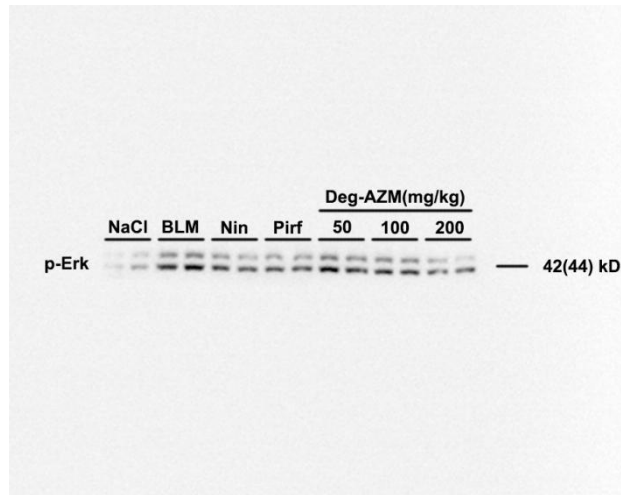

**Supplementary Figure 28.** The entire original gel of p-Erk in Figure 7K.

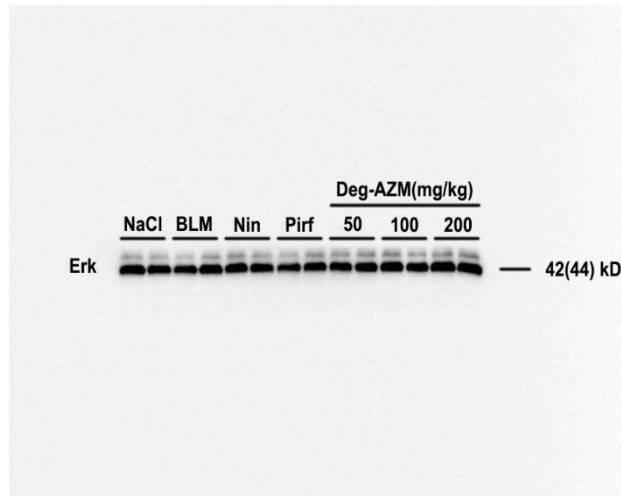

**Supplementary Figure 29.** The entire original gel of Erk in Figure 7K.

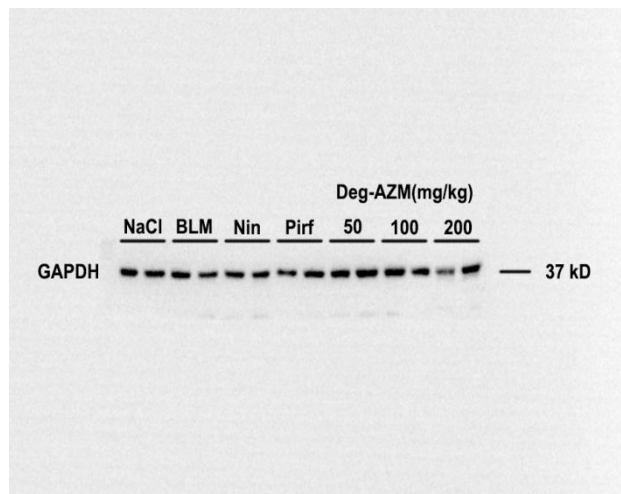

**Supplementary Figure 30.** The entire original gel of GAPDH in Figure 7K.

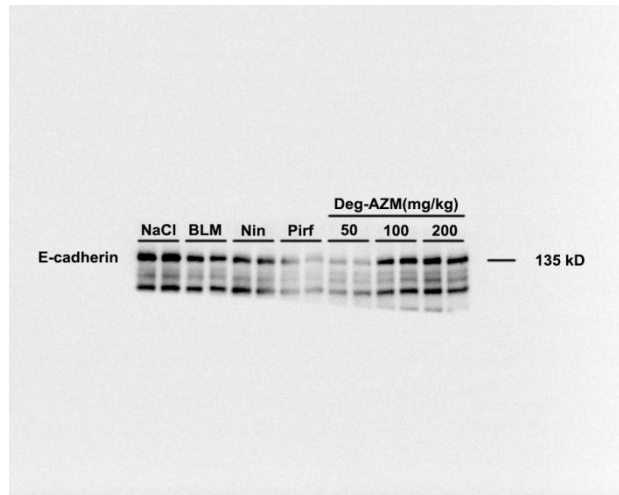

**Supplementary Figure 31.** The entire original gel of E-cadherin in Figure 8A.

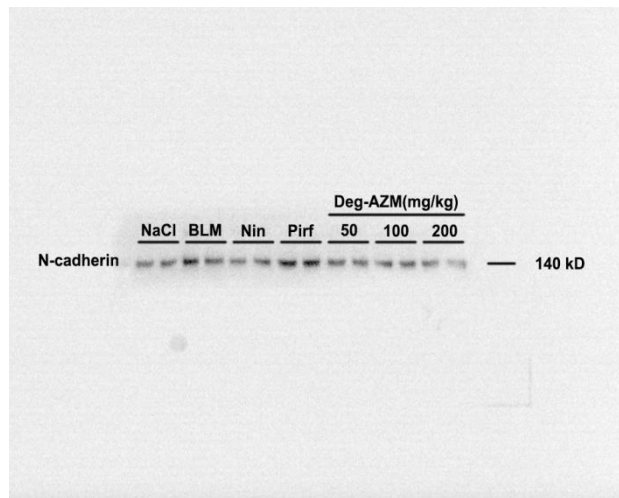

**Supplementary Figure 32.** The entire original gel of N-cadherin in Figure 8A.

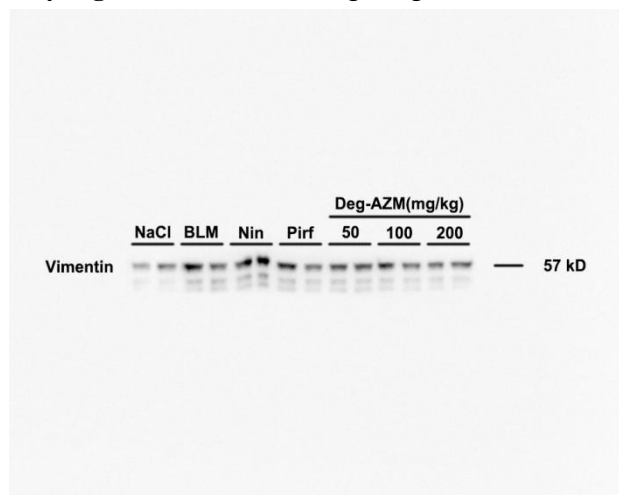

**Supplementary Figure 33.** The entire original gel of Vimentin in Figure 8A.

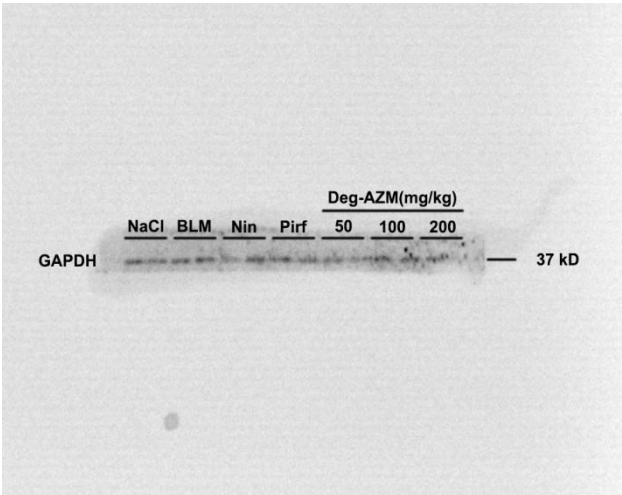

**Supplementary Figure 34.** The entire original gel of GAPDH in Figure 8A.
